# Supplementary material
Source: PubMed Central journal article supplement (PMC8567189)
Supplement: jamacardiol-e214567-s003.pdf [file jamacardiol-e214567-s003.pdf]

## Supplemental Online Content: Nonauthor Collaborators

\*Indicates required information. Only first name, last name, and suffix will appear in PubMed.

| <b>Group Name(s):* LIFE Investigators</b> |                |                       |                  |                                                |                                          |                                                         |                                                                                            |
|-------------------------------------------|----------------|-----------------------|------------------|------------------------------------------------|------------------------------------------|---------------------------------------------------------|--------------------------------------------------------------------------------------------|
| First Name and Middle Initial(s)*         | Last Name*     | Suffix (eg, Jr, III)* | Academic Degrees | Institution                                    | Location (city, state/province, country) | Role or Contribution, eg, chair, principal investigator | Group (if more than 1 Group listed in the byline) and/or Subgroup (eg, Steering Committee) |
| Selma F.                                  | Mohammed       |                       |                  | Medstar Washington Hospital Center             | Washington                               | DC                                                      | Study Coordinator                                                                          |
| Hellina                                   | Birru          |                       |                  | Medstar Washington Hospital Center             | Washington                               | DC                                                      | Study Coordinator                                                                          |
| Etsubdink                                 | Aboye          |                       |                  | Medstar Washington Hospital Center             | Washington                               | DC                                                      | Study Coordinator                                                                          |
| Phillip H.                                | Lam            |                       | MD               | Medstar Washington Hospital Center             | Washington                               | DC                                                      | Principal Investigator                                                                     |
| Nicole                                    | Escobar        |                       |                  | University of Pennsylvania Health System       | Philadelphia                             | PA                                                      | Study Coordinator                                                                          |
| Maria                                     | Fink           |                       |                  | University of Pennsylvania Health System       | Philadelphia                             | PA                                                      | Study Coordinator                                                                          |
| Thomas P.                                 | Cappola        |                       | MD               | University of Pennsylvania Health System       | Philadelphia                             | PA                                                      | Investigator                                                                               |
| Wendy                                     | Sheaffer       |                       |                  | Inova Heart and Vascular Institute             | Falls Church                             | VA                                                      | Study Coordinator                                                                          |
| Bonitta                                   | Reilly         |                       |                  | St. Vincents Cardiovascular Research Institute | Indianapolis                             | IN                                                      | Study Coordinator                                                                          |
| Jenny                                     | Ferree         |                       |                  | St. Vincents Cardiovascular Research Institute | Indianapolis                             | IN                                                      | Study Coordinator                                                                          |
| Ashwin K.                                 | Ravichandran   |                       | MD, MPH          | St. Vincents Cardiovascular Research Institute | Indianapolis                             | IN                                                      | Principal Investigator                                                                     |
| Gina                                      | Ciezkowski     |                       |                  | San Diego Cardiac Center                       | San Diego                                | CA                                                      | Study Coordinator                                                                          |
| Glenda                                    | Herrera        |                       |                  | San Diego Cardiac Center                       | San Diego                                | CA                                                      | Study Coordinator                                                                          |
| Hirsch S.                                 | Mehta          |                       | MD               | San Diego Cardiac Center                       | San Diego                                | CA                                                      | Principal Investigator                                                                     |
| Rosemarie                                 | DeLucca        |                       |                  | Geisinger Medical Center                       | Wilkes Barre                             | PA                                                      | Study Coordinator                                                                          |
| Sanjay                                    | Doddamani      |                       | MD               | Geisinger Medical Center                       | Wilkes-Barre                             | PA                                                      | Principal Investigator                                                                     |
| Manreet                                   | Kanwar         |                       | MD               | Allegheny General Hospital                     | Pittsburgh                               | PA                                                      | Principal Investigator                                                                     |
| Brooke                                    | Thomas         |                       |                  | Allegheny General Hospital                     | Pittsburgh                               | PA                                                      | Study Coordinator                                                                          |
| Laurie                                    | Machen         |                       |                  | Allegheny General Hospital                     | Pittsburgh                               | PA                                                      | Study Coordinator                                                                          |
| January                                   | Kim            |                       |                  | The Ohio State University Medical Center       | Columbus                                 | OH                                                      | Study Coordinator                                                                          |
| Athas                                     | Christina      |                       |                  | The Ohio State University Medical Center       | Columbus                                 | OH                                                      | Study Coordinator                                                                          |
| Brent C.                                  | Lampert        |                       | DO               | The Ohio State University Medical Center       | Columbus                                 | OH                                                      | Principal Investigator                                                                     |
| Cindy                                     | Fontenelle     |                       |                  | Oschner Clinic Foundation                      | New Orleans                              | LA                                                      | Study Coordinator                                                                          |
| Clement C.                                | Eiswirth       | Jr                    | MD               | Oschner Clinic Foundation                      | New Orleans                              | LA                                                      | Principal Investigator                                                                     |
| Julie                                     | Williams       |                       |                  | The Christ Hospital                            | Cincinnati                               | OH                                                      | Study Coordinator                                                                          |
| Darlene                                   | Rock           |                       |                  | The Christ Hospital                            | Cincinnati                               | OH                                                      | Study Coordinator                                                                          |
| Gregory F.                                | Egnaczyk       |                       | MD, PhD          | The Christ Hospital                            | Cincinnati                               | OH                                                      | Principal Investigator                                                                     |
| Enya                                      | Rentas-Sherman |                       |                  | Houston Methodist Hospital                     | Houston                                  | TX                                                      | Study Coordinator                                                                          |
| Deborah                                   | Barr           |                       |                  | Houston Methodist Hospital                     | Houston                                  | TX                                                      | Study Coordinator                                                                          |

## Supplemental Online Content: Nonauthor Collaborators

\*Indicates required information. Only first name, last name, and suffix will appear in PubMed.

| First Name and Middle Initial(s)* | Last Name*     | Suffix (eg, Jr, III)* | Academic Degrees | Institution                                   | Location (city, state/province, country) | Role or Contribution, eg, chair, principal investigator | Group (if more than 1 Group listed in the byline) and/or Subgroup (eg, Steering Committee) |
|-----------------------------------|----------------|-----------------------|------------------|-----------------------------------------------|------------------------------------------|---------------------------------------------------------|--------------------------------------------------------------------------------------------|
| Arvind                            | Bhimaraj       |                       | MD, MPH          | Houston Methodist Hospital                    | Houston TX                               |                                                         | Principal Investigator                                                                     |
| Adrianna                          | Damato         |                       |                  | Mount Sinai Hospital                          | New York NY                              |                                                         | Study Coordinator                                                                          |
| Christine                         | Calayo         |                       |                  | Sentara Norfolk General Hospital              | Norfolk VA                               |                                                         | Study Coordinator                                                                          |
| John M.                           | Herre          |                       | MD               | Sentara Norfolk General Hospital              | Norfolk VA                               |                                                         | Principal Investigator                                                                     |
| Joann                             | Lindenfeld     |                       | MD               | Vanderbilt University Medical Center          | Nashville TN                             |                                                         | Principal Investigator                                                                     |
| Amanda                            | Carroll        |                       |                  | Vanderbilt University Medical Center          | Nashville TN                             |                                                         | Study Coordinator                                                                          |
| Mary                              | Gordon         |                       |                  | Vanderbilt University Medical Center          | Nashville TN                             |                                                         | Study Coordinator                                                                          |
| Mary E.                           | Keebler        |                       | MD               | UPMC Heart and Vascular Institute             | Pittsburgh PA                            |                                                         | Principal Investigator                                                                     |
| Bandaa                            | Setliff        |                       |                  | The Charlotte-mecklenburg Hospital Authority  | Charlotte NC                             |                                                         | Study Coordinator                                                                          |
| Sanjeev K.                        | Gulati         |                       | MD               | The Charlotte-mecklenburg Hospital Authority  | Charlotte NC                             |                                                         | Principal Investigator                                                                     |
| Krystal                           | Winkler        |                       |                  | The Charlotte-mecklenburg Hospital Authority  | Charlotte NC                             |                                                         | Study Coordinator                                                                          |
| Laura                             | Curtin         |                       |                  | University of Washington Medical Center       | Seattle WA                               |                                                         | Study Coordinator                                                                          |
| Carly                             | Ohmart         |                       |                  | University of Washington Medical Center       | Seattle WA                               |                                                         | Study Coordinator                                                                          |
| John                              | Halvorson      |                       |                  | Oregon Health and Science University          | Portland OR                              |                                                         | Study Coordinator                                                                          |
| James O.                          | Mudd           |                       | MD               | Providence Center for Advanced heart Disease  | Spokane WA                               |                                                         | Principal Investigator                                                                     |
| S. Albert                         | Camacho        |                       | MD               | Oregon Health and Science University          | Portland OR                              |                                                         | Principal Investigator                                                                     |
| Maryse                            | Palardy        |                       | MD               | University of Michigan Health System          | Ann Arbor MI                             |                                                         | Principal Investigator                                                                     |
| Neha                              | Shah           |                       |                  | University of Michigan Health System          | Ann Arbor MI                             |                                                         | Study Coordinator                                                                          |
| Kristina                          | Picardi        |                       |                  | Piedmont Heart Institute                      | Atlanta GA                               |                                                         | Study Coordinator                                                                          |
| Arun                              | Krishnamoorthy |                       | MD               | Piedmont Heart Institute                      | Atlanta GA                               |                                                         | Principal Investigator                                                                     |
| Adrienne                          | Maximin        |                       |                  | Integrus Baptist Medical Center               | Oklahoma City OK                         |                                                         | Study Coordinator                                                                          |
| Douglas A.                        | Horstmanshof   |                       | MD               | Integrus Baptist Medical Center               | Oklahoma City OK                         |                                                         | Principal Investigator                                                                     |
| Beverly                           | Seiler         |                       |                  | Sutter Medical Center Sacramento              | Sacramento CA                            |                                                         | Study Coordinator                                                                          |
| Zi J.                             | Xu             |                       | MD               | Sutter Medical Center Sacramento              | Sacramento CA                            |                                                         | Principal Investigator                                                                     |
| Savannah                          | Mersola        |                       |                  | Cedars-Sinai Heart Institute                  | Beverly Hills CA                         |                                                         | Study Coordinator                                                                          |
| Evan P.                           | Kransdorf      |                       | MD               | Cedars-Sinai Heart Institute                  | Beverly Hills CA                         |                                                         | Principal Investigator                                                                     |
| Wilson                            | Tang           |                       | MD               | Cleveland Clinic Foundation                   | Cleveland OH                             |                                                         | Investigator                                                                               |
| Teresa                            | Fonk           |                       |                  | Cleveland Clinic Foundation                   | Cleveland OH                             |                                                         | Study Coordinator                                                                          |
| Eiran Z.                          | Gorodeski      |                       | MD, MPH          | University Hospitals Cleveland Medical Center | Cleveland OH                             |                                                         | Principal Investigator                                                                     |
| Guilherme H.                      | Oliveira       |                       | MD               | Tampa General Hospital                        | Tampa FL                                 |                                                         | Principal Investigator                                                                     |

Supplemental Online Content: Nonauthor Collaborators

\*Indicates required information. Only first name, last name, and suffix will appear in PubMed.

| First Name and Middle Initial(s)* | Last Name*     | Suffix (eg, Jr, III)* | Academic Degrees | Institution                                   | Location (city, state/province, country) | Role or Contribution, eg, chair, principal investigator | Group (if more than 1 Group listed in the byline) and/or Subgroup (eg, Steering Committee) |
|-----------------------------------|----------------|-----------------------|------------------|-----------------------------------------------|------------------------------------------|---------------------------------------------------------|--------------------------------------------------------------------------------------------|
| Terrence                          | Semeneć        |                       |                  | University Hospitals Cleveland Medical Center | Cleveland                                | OH                                                      | Study Coordinator                                                                          |
| Nadine                            | Norton         |                       |                  | University Hospitals Cleveland Medical Center | Cleveland                                | OH                                                      | Study Coordinator                                                                          |
| Julie                             | Nichols        |                       |                  | Metro Health System                           | Cleveland                                | OH                                                      | Study Coordinator                                                                          |
| Peter                             | Leo            |                       |                  | Metro Health System                           | Cleveland                                | OH                                                      | Study Coordinator                                                                          |
| Mark E.                           | Dunlap         |                       | MD               | Metro Health System                           | Cleveland                                | OH                                                      | Principal Investigator                                                                     |
| G. Michael                        | Felker         |                       | MD               | Duke University Medical Center                | Durham                                   | NC                                                      | Investigator                                                                               |
| Lacey                             | Taylor         |                       |                  | Duke University Medical Center                | Durham                                   | NC                                                      | Study Coordinator                                                                          |
| Mary                              | Sheehan        |                       |                  | Brigham and Women's Hospital                  | Boston                                   | MA                                                      | Study Coordinator                                                                          |
| Sharon                            | Levine         |                       |                  | Brigham and Women's Hospital                  | Boston                                   | MA                                                      | Study Coordinator                                                                          |
| Diane                             | Cocca-Spofford |                       |                  | Massachusetts General Hospital                | Boston                                   | MA                                                      | Study Coordinator                                                                          |
| Liana                             | Brooks         |                       |                  | Massachusetts General Hospital                | Boston                                   | MA                                                      | Study Coordinator                                                                          |
| Thomas                            | Cunningham     |                       |                  | Massachusetts General Hospital                | Boston                                   | MA                                                      | Study Coordinator                                                                          |
| Nancy                             | Acker          |                       |                  | Mayo Clinic                                   | Rochester                                | MN                                                      | Study Coordinator                                                                          |
| Susan                             | Milbrandt      |                       |                  | Mayo Clinic                                   | Rochester                                | MN                                                      | Study Coordinator                                                                          |
| Janet                             | Gatzke         |                       |                  | Mayo Clinic                                   | Rochester                                | MN                                                      | Study Coordinator                                                                          |
| Victor G.                         | Davila-Roman   |                       | MD               | Washington University School of Medicine      | St. Louis                                | MO                                                      | Principal Investigator                                                                     |
| Anne                              | Dirks          |                       |                  | Washington University School of Medicine      | St. Louis                                | MO                                                      | Study Coordinator                                                                          |
| Karen                             | Bult           |                       |                  | Washington University School of Medicine      | St. Louis                                | MO                                                      | Study Coordinator                                                                          |
| Elizabeth                         | Weber          |                       |                  | Saint Louis University Hospital               | St. Louis                                | MO                                                      | Study Coordinator                                                                          |
| Mary                              | Lesko          |                       |                  | Saint Louis University Hospital               | St. Louis                                | MO                                                      | Study Coordinator                                                                          |
| Deana                             | Mikhalkova     |                       | MD               | Saint Louis University Hospital               | St. Louis                                | MO                                                      | Principal Investigator                                                                     |
| Kathleen                          | Fitzgerald     |                       |                  | Thomas Jefferson University Hospital          | Philadelphia                             | PA                                                      | Study Coordinator                                                                          |
| David J.                          | Whellan        |                       | MD, MHS          | Thomas Jefferson University Hospital          | Philadelphia                             | PA                                                      | Principal Investigator                                                                     |
| Omar                              | Wever-Pinzon   |                       | MD               | University of Utah Hospitals and Clinics      | Salt Lake City                           | UT                                                      | Principal Investigator                                                                     |
| Jonathan                          | Gutierrez      |                       |                  | University of Utah Hospitals and Clinics      | Salt Lake City                           | UT                                                      | Study Coordinator                                                                          |
| Yvette                            | Goldsborough   |                       |                  | Johns Hopkins Hospital                        | Baltimore                                | MD                                                      | Study Coordinator                                                                          |
| Nisha A.                          | Gilotra        |                       | MD               | Johns Hopkins Hospital                        | Baltimore                                | MD                                                      | Principal Investigator                                                                     |
| Indre                             | Caikauskaitė   |                       |                  | Stony Brook University Medical Center         | Stony Brook                              | NY                                                      | Study Coordinator                                                                          |
| Hal A.                            | Skopicki       |                       | MD, PhD          | Stony Brook University Medical Center         | Stony Brook                              | NY                                                      | Principal Investigator                                                                     |
| Gordon S.                         | Huggins        |                       | MD               | Tufts Medical Center                          | Boston                                   | MA                                                      | Investigator                                                                               |

Supplemental Online Content: Nonauthor Collaborators

\*Indicates required information. Only first name, last name, and suffix will appear in PubMed.

| First Name and Middle Initial(s)* | Last Name* | Suffix (eg, Jr, III)* | Academic Degrees | Institution                    | Location (city, state/province, country) | Role or Contribution, eg, chair, principal investigator | Group (if more than 1 Group listed in the byline) and/or Subgroup (eg, Steering Committee) |
|-----------------------------------|------------|-----------------------|------------------|--------------------------------|------------------------------------------|---------------------------------------------------------|--------------------------------------------------------------------------------------------|
| Nathan                            | Yuen       |                       |                  | Tufts Medical Center           | Boston                                   | MA                                                      | Study Coordinator                                                                          |
| Abbey                             | Haynes     |                       |                  | Tufts Medical Center           | Boston                                   | MA                                                      | Study Coordinator                                                                          |
| Carr                              | Katie      |                       |                  | Tufts Medical Center           | Boston                                   | MA                                                      | Study Coordinator                                                                          |
| Gail                              | Snell      |                       |                  | Emory University Hospital      | Atlanta                                  | GA                                                      | Study Coordinator                                                                          |
| Andrew L.                         | Smith      |                       | MD               | Emory University Hospital      | Atlanta                                  | GA                                                      | Investigator                                                                               |
| Brandon                           | Walker     |                       |                  | Emory University Hospital      | Atlanta                                  | GA                                                      | Study Coordinator                                                                          |
| Jovita                            | Johnson    |                       |                  | Emory University Hospital      | Atlanta                                  | GA                                                      | Study Coordinator                                                                          |
| Simmons                           | Henderson  |                       |                  | Emory University Hospital      | Atlanta                                  | GA                                                      | Study Coordinator                                                                          |
| Sunil                             | Pauwaa     |                       | MD               | Advocate Christ Medical Center | Oak Lawn                                 | IL                                                      | Principal Investigator                                                                     |
| Geetha                            | Bhat       |                       | MD, PhD          | Advocate Christ Medical Center | Oak Lawn                                 | IL                                                      | Principal Investigator                                                                     |
| Ann                               | Gagliardi  |                       |                  | Advocate Christ Medical Center | Oak Lawn                                 | IL                                                      | Study Coordinator                                                                          |
