# Supplementary material
Source: PubMed Central journal article supplement (PMC8567189)
Supplement: jamacardiol-e214567-s004.pdf [file jamacardiol-e214567-s004.pdf]

## Data Sharing Statement

Mann. Effect of Treatment With Sacubitril/Valsartan in Patients With Advanced Heart Failure and Reduced Ejection Fraction. *JAMA Cardiol.* Published November 03, 2021.

doi:10.1001/jamacardio.2021.4567

### Data

**Data available:** Yes

**Data types:** Deidentified participant data

**How to access data:** Data will be made available via BioLINCC, according to the NIH policy (<https://biolincc.nhlbi.nih.gov/home/>). Data will be made available 2 years after publication of the results presented herewith.

**When available:** beginning date: 08-25-2023

### Supporting Documents

**Document types:** None

### Additional Information

**Who can access the data:** Data will be made available via BioLINCC, according to the NIH policy (<https://biolincc.nhlbi.nih.gov/home/>). Data will be made available 2 years after publication of the results presented herewith.

**Types of analyses:** Data will be made available via BioLINCC, according to the NIH policy (<https://biolincc.nhlbi.nih.gov/home/>). Data will be made available 2 years after publication of the results presented herewith.

**Mechanisms of data availability:** Data will be made available via BioLINCC, according to the NIH policy (<https://biolincc.nhlbi.nih.gov/home/>). Data will be made available 2 years after publication of the results presented herewith.

**Any additional restrictions:** Data will be made available 2 years after publication of the results presented herewith.
